# Supplementary material for: A bibliometric analysis of research productivity in Parasitology by different world regions during a 9-year period (1995–2003)
Source: PubMed Central journal article supplement (PMC1431540; doi:10.1186/1471-2334-6-56), 2006-03-17
Supplement: 1471-2334-6-56-S1.pdf [file 1471-2334-6-56-S1.pdf]

**Additional File 1. Number of articles published in journals included in the field of Parasitology category of “Journal Citation Report” database and indexed by PubMed, from different world regions, for the period 1995-2003.**

|                                          | 1995                                                            | 1996       | 1997       | 1998       | 1999       | 2000       | 2001       | 2002       | 2003       | 1995-2003   |                           |  |
|------------------------------------------|-----------------------------------------------------------------|------------|------------|------------|------------|------------|------------|------------|------------|-------------|---------------------------|--|
| <b>WORLD AREAS</b>                       | <b>Number of articles (% percentage within a calendar year)</b> |            |            |            |            |            |            |            |            |             | <b>Mean impact factor</b> |  |
|                                          |                                                                 |            |            |            |            |            |            |            |            |             | <i>(1995 - 2003)</i>      |  |
| <b>Western Europe</b>                    | 599 (35.7)                                                      | 626 (35.3) | 689 (36.2) | 660 (34.2) | 704 (35.1) | 806 (36.7) | 776 (35.0) | 681 (31.4) | 761 (33.9) | 6302 (34.8) | 1.80                      |  |
| <b>USA</b>                               | 397 (23.6)                                                      | 418 (23.6) | 393 (20.7) | 372 (19.3) | 388 (19.4) | 417 (19.0) | 451 (20.4) | 371 (17.1) | 392 (17.5) | 3599 (19.9) | 1.88                      |  |
| <b>Latin America &amp; the Caribbean</b> | 213 (12.7)                                                      | 233 (13.2) | 258 (13.6) | 353 (18.3) | 384 (19.2) | 361 (16.4) | 407 (18.4) | 475 (21.9) | 427 (19.0) | 3111 (17.2) | 1.07                      |  |
| <b>Asia (excluding Japan)</b>            | 96 (5.7)                                                        | 104 (5.9)  | 137 (7.2)  | 112 (5.8)  | 135 (6.7)  | 170 (7.7)  | 161 (7.3)  | 198 (9.1)  | 202 (9.0)  | 1315 (7.3)  | 1.37                      |  |
| <b>Oceania</b>                           | 145 (8.6)                                                       | 142 (8.0)  | 143 (7.5)  | 137 (7.1)  | 157 (7.8)  | 137 (6.2)  | 104 (4.7)  | 106 (4.9)  | 108 (4.8)  | 1179 (6.5)  | 1.86                      |  |
| <b>Africa</b>                            | 103 (6.1)                                                       | 99 (5.6)   | 119 (6.3)  | 125 (6.5)  | 95 (4.7)   | 111 (5.1)  | 84 (3.8)   | 121 (5.6)  | 107 (4.8)  | 964 (5.3)   | 1.27                      |  |
| <b>Japan</b>                             | 57 (3.4)                                                        | 62 (3.5)   | 63 (3.3)   | 57 (3.0)   | 51 (2.5)   | 72 (3.3)   | 81 (3.7)   | 86 (4.0)   | 113 (5.0)  | 642 (3.6)   | 1.49                      |  |
| <b>Eastern Europe</b>                    | 32 (1.9)                                                        | 39 (2.2)   | 43 (2.3)   | 63 (3.3)   | 56 (2.8)   | 83 (3.8)   | 109 (4.9)  | 91 (4.2)   | 96 (4.3)   | 612 (3.4)   | 1.11                      |  |
| <b>Canada</b>                            | 37 (2.2)                                                        | 48 (2.7)   | 58 (3.0)   | 50 (2.6)   | 33 (1.6)   | 39 (1.8)   | 42 (1.9)   | 42 (1.9)   | 37 (1.7)   | 386 (2.1)   | 1.69                      |  |
| <b>Total</b>                             | 1679                                                            | 1771       | 1903       | 1929       | 2003       | 2196       | 2215       | 2171       | 2243       | 18110       |                           |  |
